# Supplementary material for: Mycolactone subverts immunity by selectively blocking the Sec61 translocon
Source: PubMed Central journal article supplement — J Exp Med. 2016 Dec 12;213(13):2885–96. doi: 10.1084/jem.20160662 (PMC5154940; doi:10.1084/jem.20160662), 2016-12-12
Supplement: JEM_20160662_sm.pdf [file JEM_20160662_sm.pdf]

SUPPLEMENTAL MATERIAL

Baron et al., <https://doi.org/10.1084/jem.20160662>

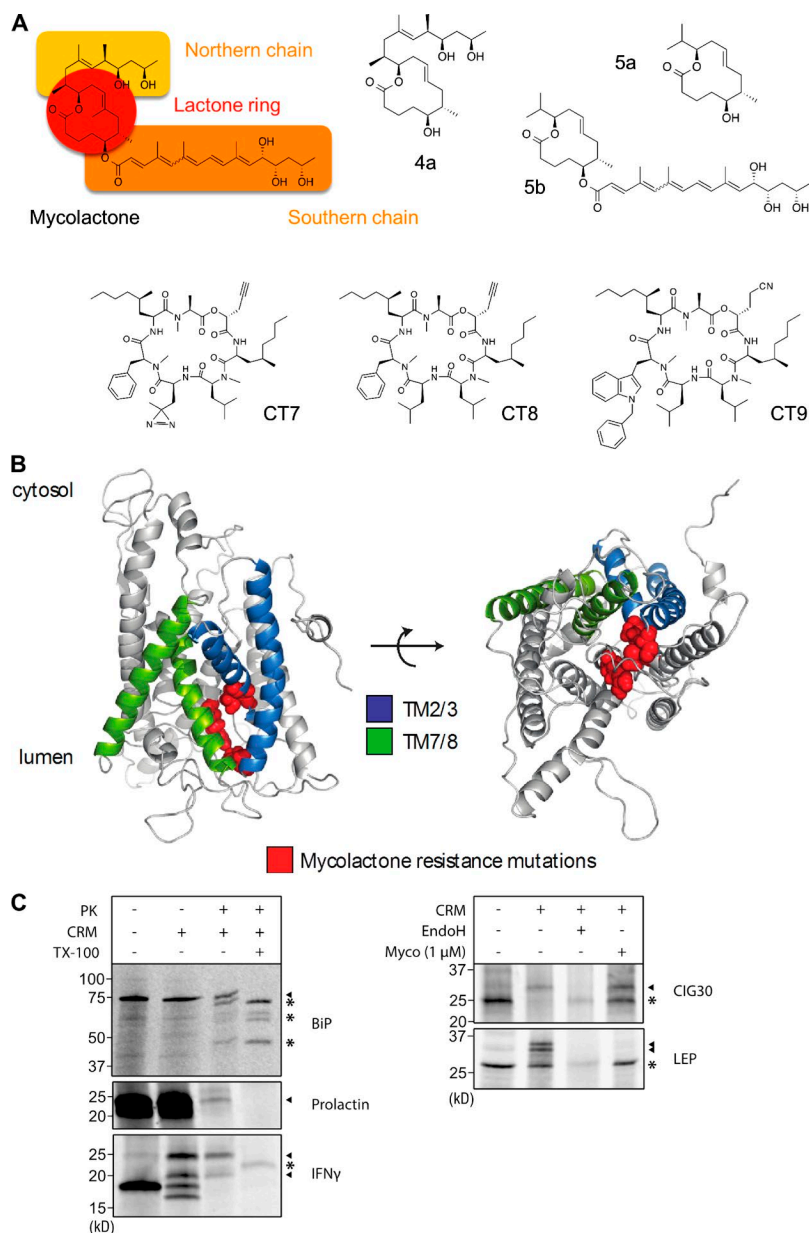

Figure S1. **Mycolactone and cotransin analogs used in this study, localization of mycolactone-resistance mutations in Sec61 $\alpha$  and IVT controls.** (A) Chemical structures of natural mycolactone (A/B form; from *M. ulcerans* strain 1615), synthetic subunits of mycolactone, and cotransin variants used in this study. (B) Mutations associated with mycolactone resistance are located near the luminal plug of Sec61 $\alpha$ . A homology model of human Sec61 $\alpha$  showing the location of mycolactone-resistance mutations (red) is shown. Lateral gate helices and hydrophobic transmembrane domains TM2/3 and TM7/8 are colored in blue and green, respectively. (C, left) ER translocation of BiP, prolactin, and IFN- $\gamma$  were confirmed by proteinase K (PK) treatment in the presence and absence of detergent (TX-100). Correctly translocated protein species are indicated with arrowheads. Protease-resistant fragments are indicated with asterisks. ER translocation of these nonglycosylated proteins does not cause a change in band mobility, and resistance to proteinase K was used to indicate the fraction of ER-translocated polypeptide. Treating microsomes with proteinase K and detergent abolished the protected species, indicating correct translocation to the lumen of ER microsomes. (Right) Glycosylation of CIG30 and LEP was assessed by EndoH treatment. Membrane-integrated, glycosylated protein species are indicated with arrowheads and nonintegrated species are indicated with an asterisk. Difference in band mobility indicates that these proteins become glycosylated within the ER lumen upon correct membrane integration. EndoH treatment demonstrates that the altered mobility is caused by protein glycosylation. Myco, mycolactone.

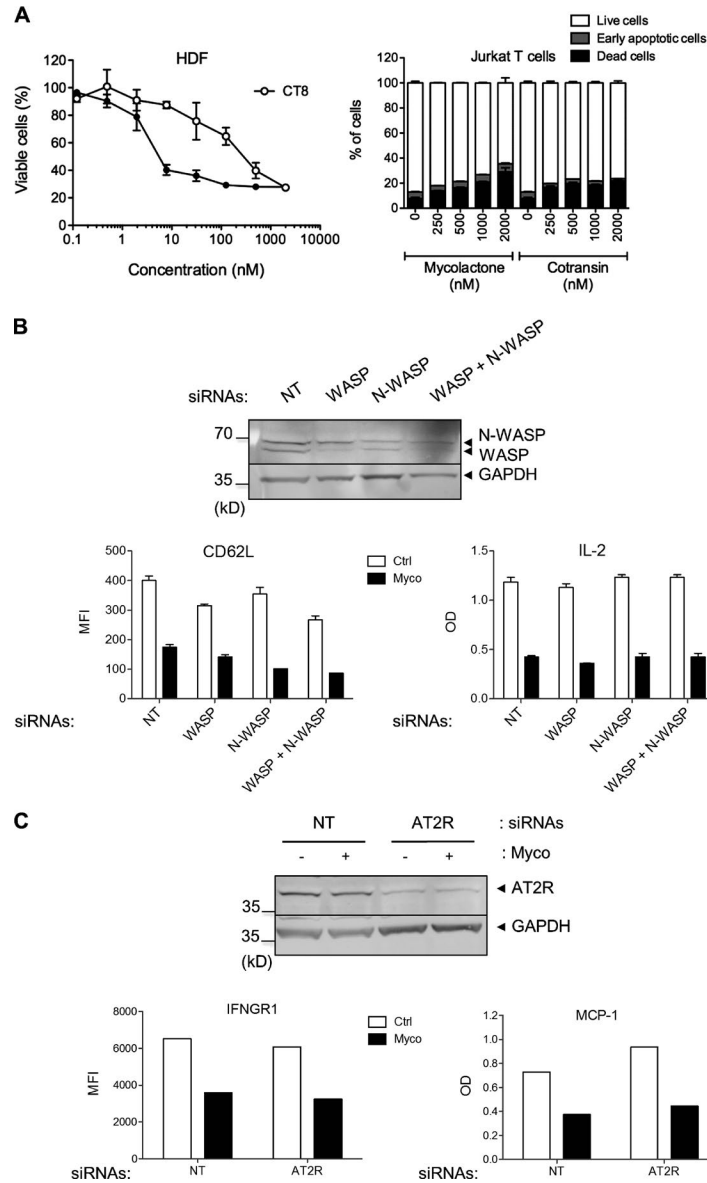

Figure S2. **Cytotoxicity of mycolactone and CT8 and contribution of WASP/N-WASP and AT2R to mycolactone effects on secretory protein production.** (A) Differential cytotoxicity of mycolactone and CT8. (Left) Cell viability, as assessed by methyl-thiazolyl-tetrazolium reduction of human primary dermal fibroblasts (HDF) incubated with mycolactone, CT8, or solvent for 48 h. Annexin V<sup>+</sup>/propidium iodide (PI)<sup>-</sup> cells were identified as early apoptotic cells, annexin V<sup>+</sup>/PI<sup>+</sup> cells as late apoptotic (dead) cells, and annexin V<sup>-</sup>/PI<sup>-</sup> cells as live cells. Data are mean percentages  $\pm$  SD of duplicates relative to solvent and are representative of three independent experiments. (B) Mycolactone (Myco)-mediated inhibition of secreted and membrane protein production is WASP/N-WASP independent. Western blot analysis of total WASP, N-WASP, and GAPDH as loading control in Jurkat T cells transfected with siRNAs targeting WASP, N-WASP, or both proteins or nontargeting (NT) siRNAs as controls for 48 h is shown. (Left) Flow cytometric analysis of CD62L surface expression in siRNA-transfected Jurkat T cells exposed to 25 nM mycolactone or solvent (Ctrl) for 16 h. Mean fluorescent intensities (MFI)  $\pm$  SD of duplicates are shown. (Right) IL-2 production by siRNA-transfected Jurkat T cells treated with 25 nM mycolactone or solvent for 1 h before activation with PMA/IO for 16 h. Mean OD  $\pm$  SD of duplicates is shown. Data are representative of two independent experiments. (C) Mycolactone-mediated inhibition of secretory protein production is AT2R independent. Western blot analysis of total AT2R and GAPDH as loading control in HeLa cells transfected with siRNAs targeting AT2R or nontargeting siRNAs as controls for 60 h and then incubated with 50 nM mycolactone or solvent for 16 h is shown. (Left) Flow cytometric analysis of IFNGR1 surface expression in siRNA-transfected HeLa cells exposed to 50 nM mycolactone or solvent for 16 h. Mean fluorescent intensities are shown. (Right) MCP-1 production by siRNA-transfected HeLa cells treated with 50 nM mycolactone or solvent for 16 h. Mean OD  $\pm$  SD of duplicates is shown. Data are representative of two independent experiments.

Table S1. Proteomic profiling of mycolactone-exposed Jurkat T cells

| Accession <sup>a</sup> | Gene <sup>a</sup> | Full protein name <sup>a</sup>                                                            | Mean <sup>b</sup> | SD <sup>b</sup> | GO_CC <sup>a</sup>                | SS or TMD | Protein type | IFN- $\gamma$ induced <sup>c</sup> |
|------------------------|-------------------|-------------------------------------------------------------------------------------------|-------------------|-----------------|-----------------------------------|-----------|--------------|------------------------------------|
| Down-regulated         |                   |                                                                                           |                   |                 |                                   |           |              |                                    |
| <b>Q96PP8</b>          | <b>GBP5</b>       | <b>Guanylate-binding protein 5</b>                                                        | <b>-2.76</b>      | <b>0.75</b>     | <b>Cytoplasm, membrane</b>        |           |              | <b>+</b>                           |
| Q07108                 | CD69              | Early activation antigen CD69                                                             | -2.90             | 0.47            | Plasma membrane                   | TMD       | SP II        | -                                  |
| <b>P13746</b>          | <b>HLA-A</b>      | <b>HLA class I histocompatibility antigen, A-11 <math>\alpha</math> chain</b>             | <b>-1.91</b>      | <b>0.84</b>     | <b>ER, golgi, plasma membrane</b> | <b>SS</b> | <b>SP I</b>  | <b>+</b>                           |
| <b>P32456</b>          | <b>GBP2</b>       | <b>Interferon-induced guanylate-binding protein 2</b>                                     | <b>-2.29</b>      | <b>0.06</b>     | <b>Cytoplasm, nucleus, golgi</b>  |           |              | <b>+</b>                           |
| <b>P10321</b>          | <b>HLA-C</b>      | <b>HLA class I histocompatibility antigen, Cw-7 <math>\alpha</math> chain</b>             | <b>-2.12</b>      | <b>0.10</b>     | <b>ER, golgi, plasma membrane</b> | <b>SS</b> | <b>SP I</b>  | <b>+</b>                           |
| Q95727                 | CRTAM             | Cytotoxic and regulatory T cell molecule                                                  | -2.79             | 1.35            | Plasma membrane                   | SS        | SP I         | -                                  |
| Q92854                 | SEMA4D            | Semaphorin-4D                                                                             | -1.68             | 0.19            | Plasma membrane                   | SS        | SP I         | -                                  |
| <b>P42224</b>          | <b>STAT1</b>      | <b>HUMAN signal transducer and activator of transcription 1-<math>\alpha/\beta</math></b> | <b>-1.70</b>      | <b>0.03</b>     | <b>Cytoplasm, nucleus</b>         |           |              | <b>+</b>                           |
| P01850                 | TRBC1             | T cell receptor $\beta$ -1 chain C region                                                 | -1.47             | 0.34            | Plasma membrane                   | TMD       | SP           | -                                  |
| <b>P61769</b>          | <b>B2M</b>        | <b><math>\beta</math>-2-microglobulin</b>                                                 | <b>-1.55</b>      | <b>0.14</b>     | <b>Secreted</b>                   | <b>SS</b> |              | <b>+</b>                           |
| Q43736                 | ITM2A             | Integral membrane protein 2A                                                              | -1.56             | 0.05            | Membrane                          | TMD       | SP II        | -                                  |
| P09693                 | CD3G              | T cell surface glycoprotein CD3 $\gamma$ chain                                            | -1.30             | 0.36            | Plasma membrane                   | SS        | SP I         | -                                  |
| P01737                 | TCRA              | T cell receptor $\alpha$ chain V region PY14                                              | -1.39             | 0.17            | Plasma membrane                   | SS        |              | -                                  |
| P04234                 | CD3D              | T cell surface glycoprotein CD3 $\delta$ chain                                            | -1.29             | 0.02            | Plasma membrane                   | SS        | SP I         | -                                  |
| <b>P32455</b>          | <b>GBP1</b>       | <b>Interferon-induced guanylate-binding protein 1</b>                                     | <b>-1.37</b>      | <b>0.21</b>     | <b>Cytoplasm, golgi, secreted</b> |           |              | <b>+</b>                           |
| P27701                 | CD82              | CD82 antigen                                                                              | -0.90             | 0.35            | Plasma membrane                   | TMD       | MP           | -                                  |
| Q94901                 | SUN1              | SUN domain-containing protein 1                                                           | -1.02             | 0.18            | Nucleus membrane                  | TMD       | SP II        | -                                  |
| <b>Q8TDB6</b>          | <b>DTX3L</b>      | <b>E3 ubiquitin-protein ligase DTX3L</b>                                                  | <b>-1.06</b>      | <b>0.08</b>     | <b>Cytoplasm, nucleus</b>         |           |              | <b>+</b>                           |
| <b>P04439</b>          | <b>HLA-A</b>      | <b>HLA class I histocompatibility antigen, A-3 <math>\alpha</math> chain</b>              | <b>-1.12</b>      | <b>0.11</b>     | <b>Plasma membrane</b>            | <b>SS</b> | <b>SP I</b>  | <b>+</b>                           |
| <b>Q8IXQ6</b>          | <b>PARP9</b>      | <b>Poly [ADP-ribose] polymerase 9</b>                                                     | <b>-1.17</b>      | <b>0.20</b>     | <b>Cytoplasm, nucleus</b>         |           |              | <b>+</b>                           |
| Q03518                 | TAP1              | Antigen peptide transporter 1                                                             | -1.20             | 0.25            | ER, membrane                      | TMD       | MP           | -                                  |
| P42892                 | ECE1              | Endothelin-converting enzyme 1                                                            | -1.09             | 0.16            | Plasma membrane                   | TMD       | SP II        | -                                  |
| Q75787                 | ATP6AP2           | Renin receptor                                                                            | -0.99             | 0.03            | Plasma membrane                   | SS        | SP I         | -                                  |
| P13598                 | ICAM2             | Intercellular adhesion molecule 2                                                         | -0.92             | 0.06            | Plasma membrane                   | SS        | SP I         | -                                  |
| P43489                 | TNFRSF4           | Tumor necrosis factor receptor superfamily member 4                                       | -1.35             | 0.65            | Plasma membrane                   | SS        | SP I         | -                                  |
| P30533                 | LRPAP1            | $\alpha$ -2-macroglobulin receptor-associated protein                                     | -0.89             | 0.00            | ER, cytoplasm                     | SS        |              | -                                  |
| Q9BQE5                 | APOL2             | Apolipoprotein L2                                                                         | -0.88             | 0.00            | Cytoplasm                         |           |              | -                                  |
| Q15904                 | ATP6AP1           | V-type proton ATPase subunit S1                                                           | -0.75             | 0.13            | Membrane, vacuole                 | SS        | SP           | -                                  |
| Q14672                 | ADAM10            | Disintegrin and metalloproteinase domain-containing protein 10                            | -0.87             | 0.04            | Plasma membrane                   | SS        | SP I         | -                                  |
| P11021                 | HSPA5 (BiP)       | 78-kD glucose-regulated protein                                                           | -0.76             | 0.07            | ER lumen                          | SS        |              | -                                  |
| Q75976                 | CPD               | Carboxypeptidase D                                                                        | -0.84             | 0.10            | Membrane                          | SS        | SP I         | -                                  |
| P48723                 | HSPA13            | Heat shock 70-kD protein 13                                                               | -0.90             | 0.19            | ER                                | SS        |              | -                                  |
| Q460N5                 | PARP14            | Poly [ADP-ribose] polymerase 14                                                           | -0.67             | 0.08            | Nucleus, cytoplasm                |           |              | -                                  |
| Q95399                 | UTS2              | Urotensin 2                                                                               | -0.74             | 0.04            | Secreted                          | SS        |              | -                                  |
| Q96J7                  | TMX3              | Protein disulfide-isomerase TMX3                                                          | -0.74             | 0.04            | ER                                | SS        | SP           | -                                  |
| P07766                 | CD3E              | T cell surface glycoprotein CD3 $\epsilon$ chain                                          | -0.68             | 0.02            | Plasma membrane                   | SS        | SP I         | -                                  |
| P06127                 | CD5               | T cell surface glycoprotein CD5                                                           | -0.71             | 0.05            | Plasma membrane                   | SS        | SP I         | -                                  |
| Q13217                 | DNAJC3            | DnaJ homolog subfamily C member 3                                                         | -0.59             | 0.08            | ER                                | SS        |              | -                                  |
| Q8NHV1                 | GIMAP7            | GTPase IMAF family member 7                                                               | -0.58             | 0.04            | Lipid droplet, cytoplasm          |           |              | -                                  |
| Q6PIU2                 | NCEH1             | Neutral cholesterol ester hydrolase 1                                                     | -0.64             | 0.05            | Membrane                          | TMD       | SP II        | -                                  |
| Q9UBV2                 | SEL1L             | Protein sel-1 homolog 1                                                                   | -0.59             | 0.02            | ER                                | SS        | SP I         | -                                  |
| P20645                 | M6PR              | Cation-dependent mannose-6-phosphate receptor                                             | -0.60             | 0.00            | Membrane                          | SS        |              | -                                  |
| Q4G148                 | GXYLT1            | Glucoside xylosyltransferase 1                                                            | -0.62             | 0.07            | Membrane                          | TMD       | SP II        | -                                  |
| Q99805                 | TM9SF2            | Transmembrane 9 superfamily member 2                                                      | -0.57             | 0.01            | Endosome, membrane                | SS        | MP           | -                                  |
| Q99519                 | NEU1              | Sialidase 1                                                                               | -0.74             | 0.26            | Membrane                          | SS        | MP           | -                                  |
| Q8NFQ8                 | TOR1AIP2          | Torsin-1A-interacting protein 2                                                           | -0.69             | 0.18            | ER                                | TMD       | SP           | -                                  |
| P09326                 | CD48              | CD48 antigen                                                                              | -0.81             | 0.36            | Plasma membrane                   | SS        |              | -                                  |
| <b>P19474</b>          | <b>TRIM21</b>     | <b>E3 ubiquitin-protein ligase TRIM21</b>                                                 | <b>-0.62</b>      | <b>0.10</b>     | <b>Cytoplasm, nucleus</b>         |           |              | <b>+</b>                           |
| P80303                 | NUCB2             | Nucleobindin 2                                                                            | -0.54             | 0.00            | Golgi, membrane, ER, nucleus      | SS        | MP           | -                                  |
| Q13308                 | PTK7              | Inactive tyrosine-protein kinase 7                                                        | -0.59             | 0.07            | Membrane                          | SS        | SP I         | -                                  |
| Q03519                 | TAP2              | Antigen peptide transporter 2                                                             | -0.58             | 0.10            | ER, membrane                      | TMD       | MP           | -                                  |
| P05107                 | ITGB2             | Integrin $\beta$ -2                                                                       | -0.51             | 0.00            | Plasma membrane                   | SS        | SP I         | -                                  |
| Up-regulated           |                   |                                                                                           |                   |                 |                                   |           |              |                                    |
| Q96CX6                 | LRRC58            | Leucine-rich repeat-containing protein 58                                                 | 1.28              | 1.04            | Unknown                           |           |              | -                                  |

Table S1. **Proteomic profiling of mycolactone-exposed Jurkat T cells** (*Continued*)

| Accession <sup>a</sup> | Gene <sup>a</sup> | Full protein name <sup>a</sup> | Mean <sup>b</sup> | SD <sup>b</sup> | GO_CC <sup>a</sup> | SS or TMD | Protein type | IFN- $\gamma$ induced <sup>c</sup> |
|------------------------|-------------------|--------------------------------|-------------------|-----------------|--------------------|-----------|--------------|------------------------------------|
| P08107                 | HSPA1A            | Heat shock 70-kD protein 1A/1B | 0.91              | 0.11            | Cytoplasm          |           |              | –                                  |

Proteins that were downregulated or upregulated by mycolactone treatment are shown. Those induced by IFN- $\gamma$  are bold. GO\_CC, gene ontology cellular component; MP, multipass; SP I, single-pass type I; SP II, single-pass type II; SS, signal sequence; TMS, transmembrane domain.

<sup>a</sup>According to the database UniProt.

<sup>b</sup>Mean and SD of log<sub>2</sub> mycolactone/control ratios from two SILAC experiments.

<sup>c</sup>Induced by IFN- $\gamma$  (+) or not (-), according to the database Interferome.
